# Supplementary material for: Structure and formation of copper cluster ions in multiply charged He nanodroplets
Source: Royal Society of Chemistry journal article supplement (doi:10.1039/d2cp04569a), 2023-01-01
Supplement: d2cp04569a1.pdf [file d2cp04569a1.pdf]

Supporting information

## Structure and formation of copper clusters in multiply charged superfluid He nanodroplets.

O.V. Lushchikova, M. Gatchell, J. Reichegger, S. Kollotzek, F. Zappa, M. Mahmoodi-Darian, P. Scheier

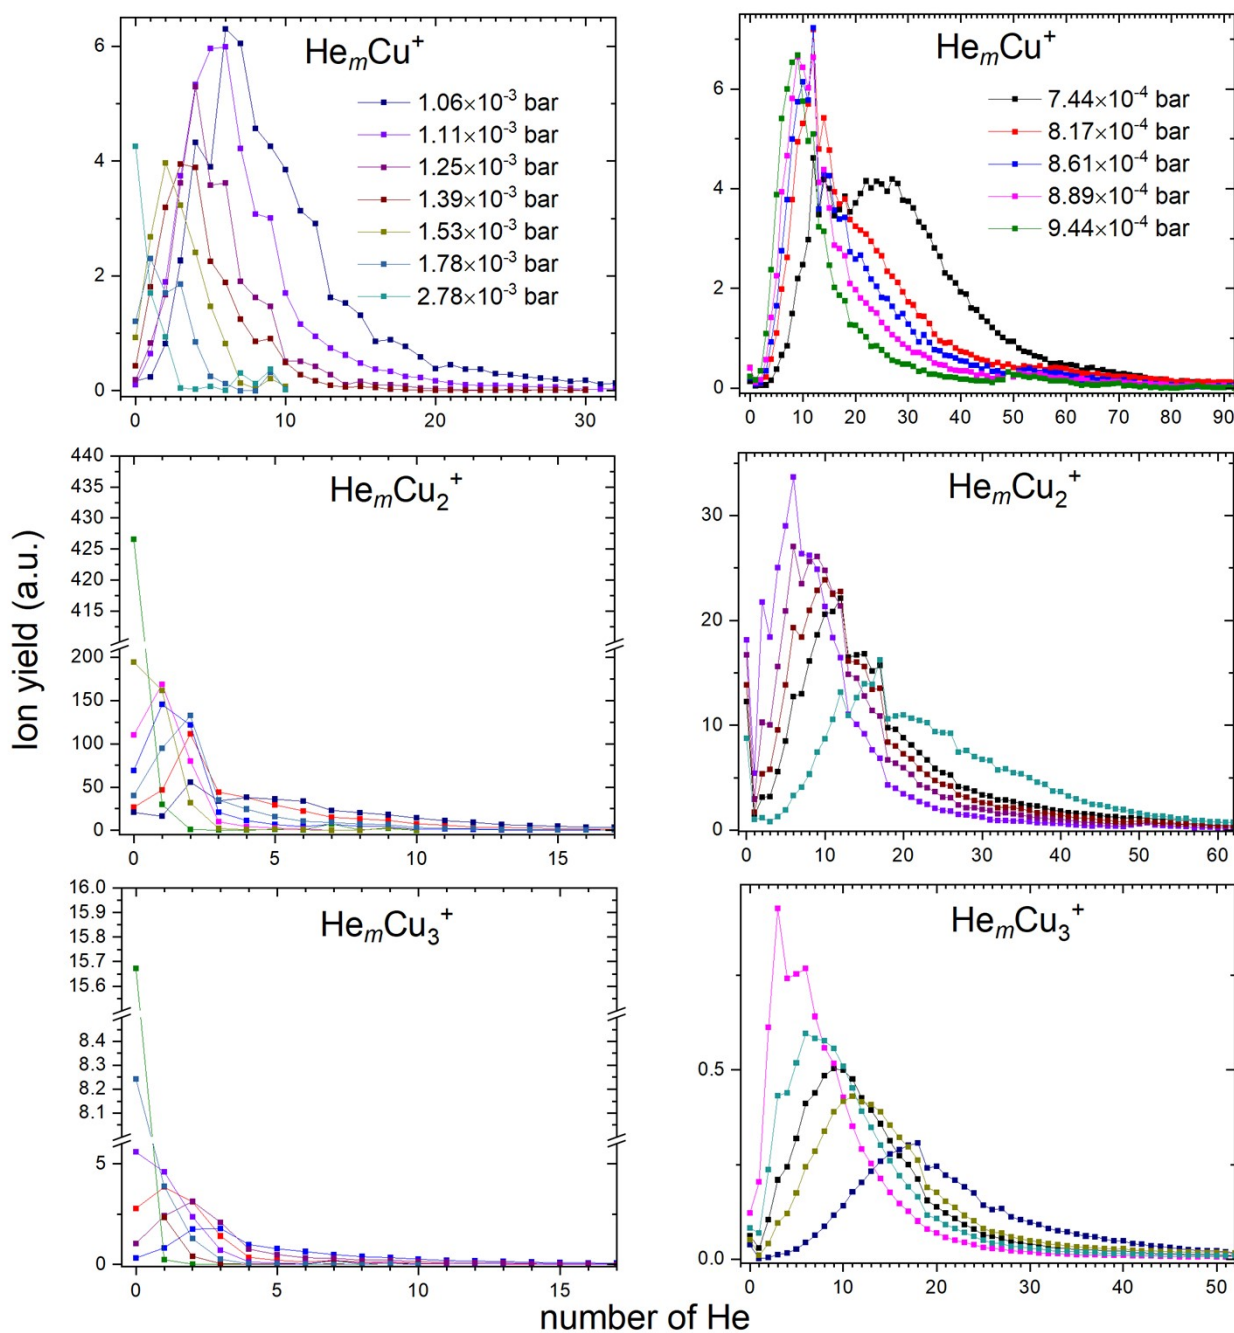

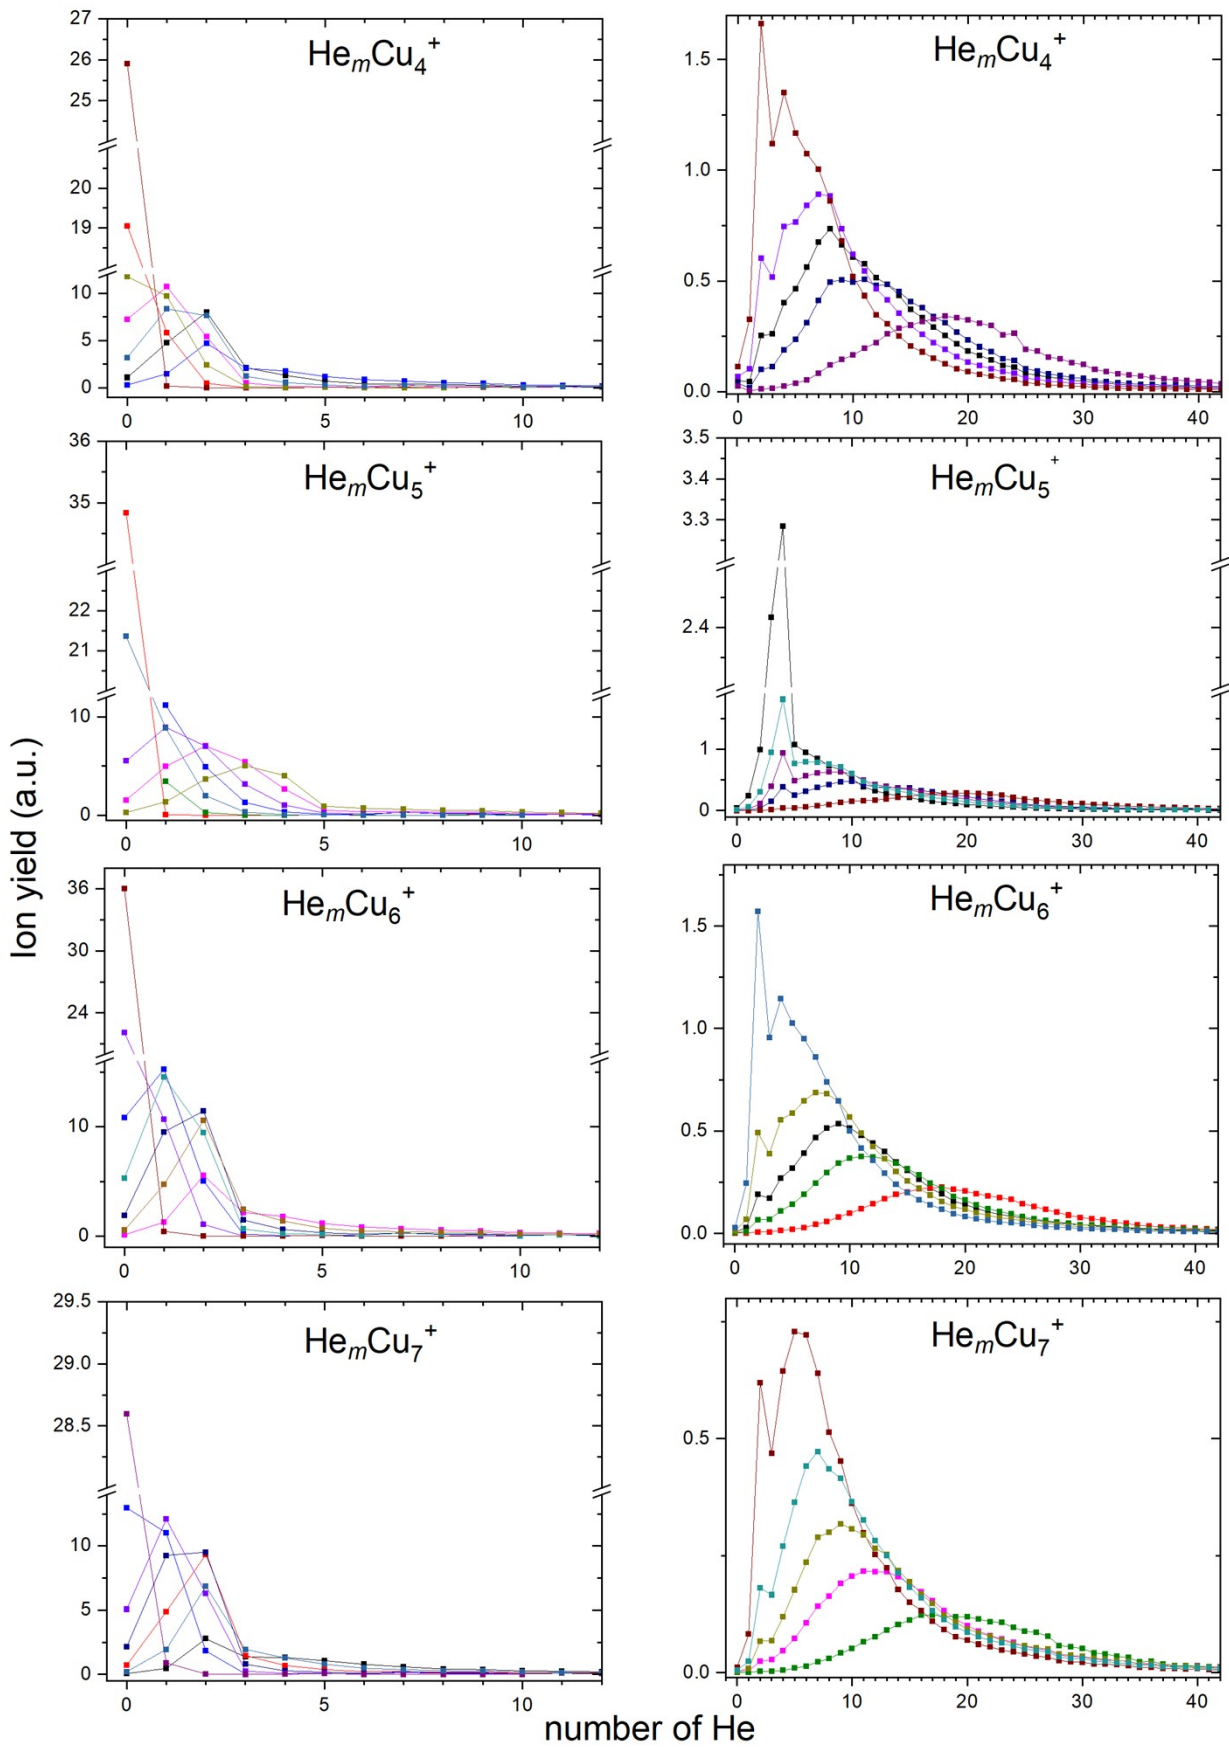

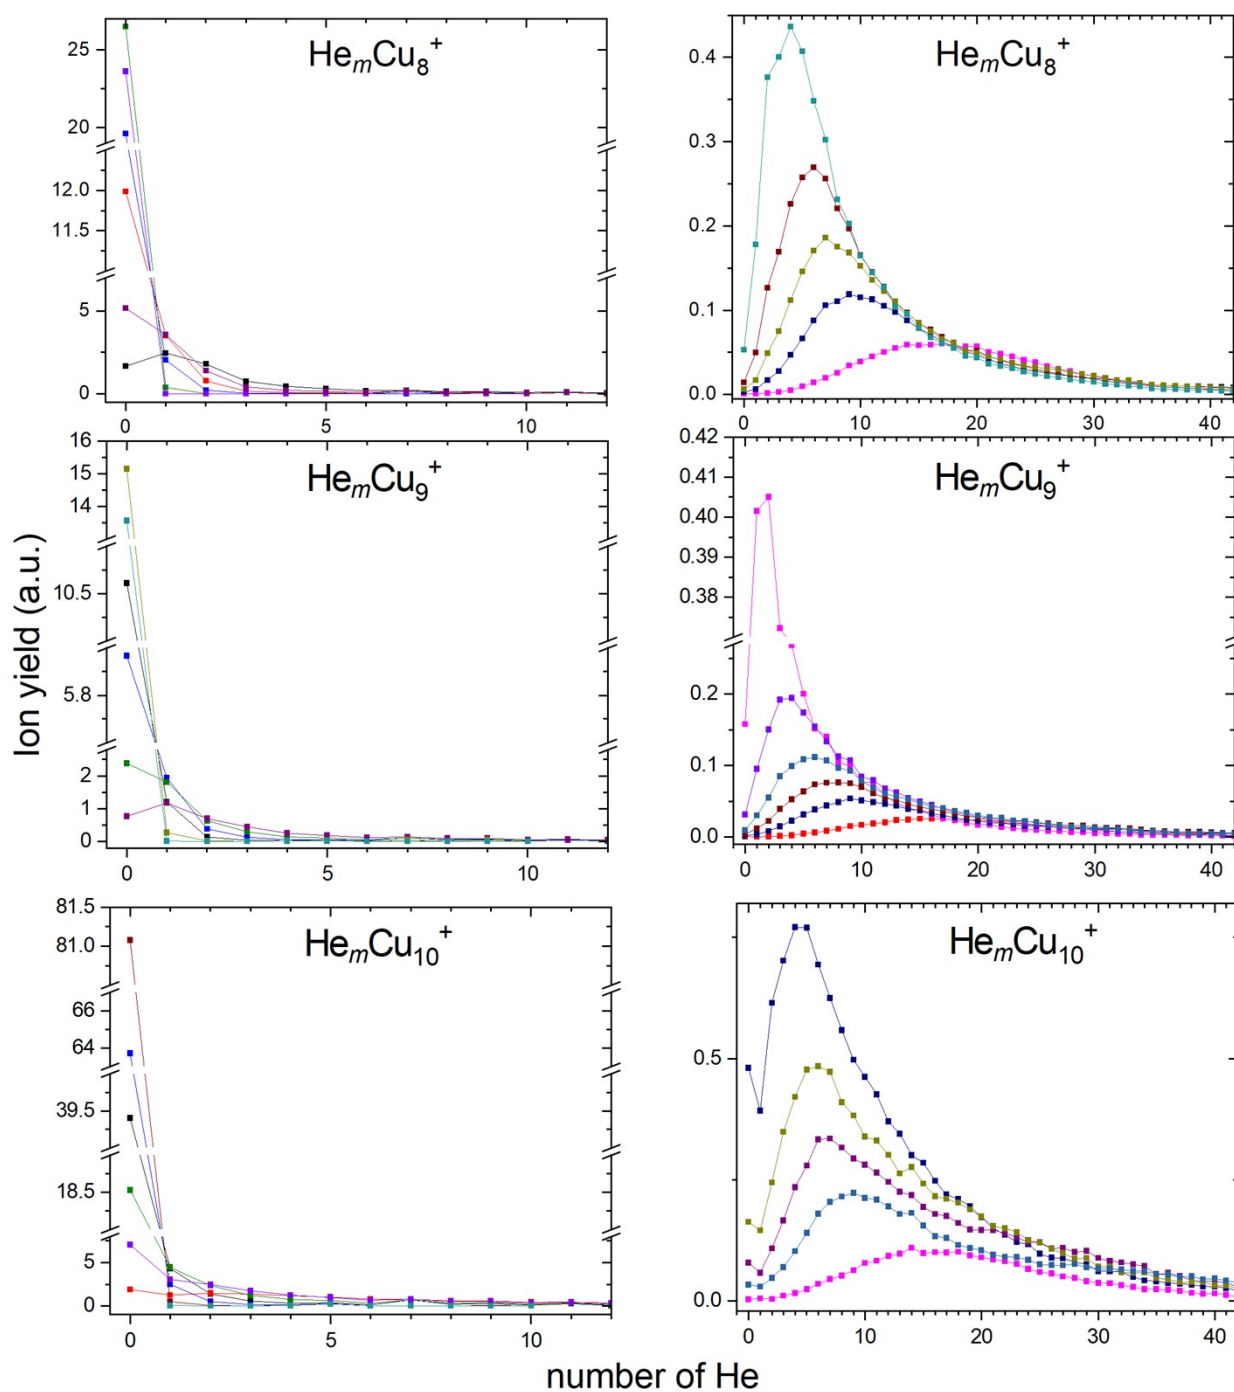

**Figure S1:** The cluster size distributions for  $\text{He}_m\text{Cu}_n^+$  for 12 different pressures. Left graphs are high-pressure measurements from 3 to  $1 \times 10^{-3}$  mbar and right graphs are low-pressure measurements from 9 to  $7 \times 10^{-4}$  mbar. The distributions for each  $n$  are shown in separate plots and the symbols represent the ion yield of every  $m$ .

**Table S1:** Comparison of the experimental parameters for the original and reference measurements illustrated in figure S2.

| <b>Experimental parameters</b> | <b>Original</b>    | <b>Reference</b>   |
|--------------------------------|--------------------|--------------------|
| He Pressure [bar]              | 22                 | 31                 |
| Nozzle Temperature [K]         | 9.5                | 9.8                |
| Ion Block Potential [V]        | 285                | 365                |
| Deflector Vertical [V]         | 10                 | 6.5                |
| Deflector Horizontal [V]       | 2.5                | 1.3                |
| Electron Energy [Ev]           | 57                 | 56                 |
| Electron Current [Ua]          | 350                | 290                |
| Float Voltage [V]              | -80                | -30                |
| Deflect Voltage [V]            | -200               | -200               |
| Float Z [V]                    | 15                 | -9                 |
| U Z [V]                        | 6.5                | 1                  |
| Float Y [V]                    | 4                  | 10                 |
| U Y [V]                        | -33                | -11                |
| Front Aperture [V]             | -300               | 0                  |
| Oven Power [W]                 | 130                | 125                |
| Oven Temperature [C]           | 779                | 750                |
| Evaporation Pressure [mbar]    | $9 \times 10^{-4}$ | $9 \times 10^{-4}$ |

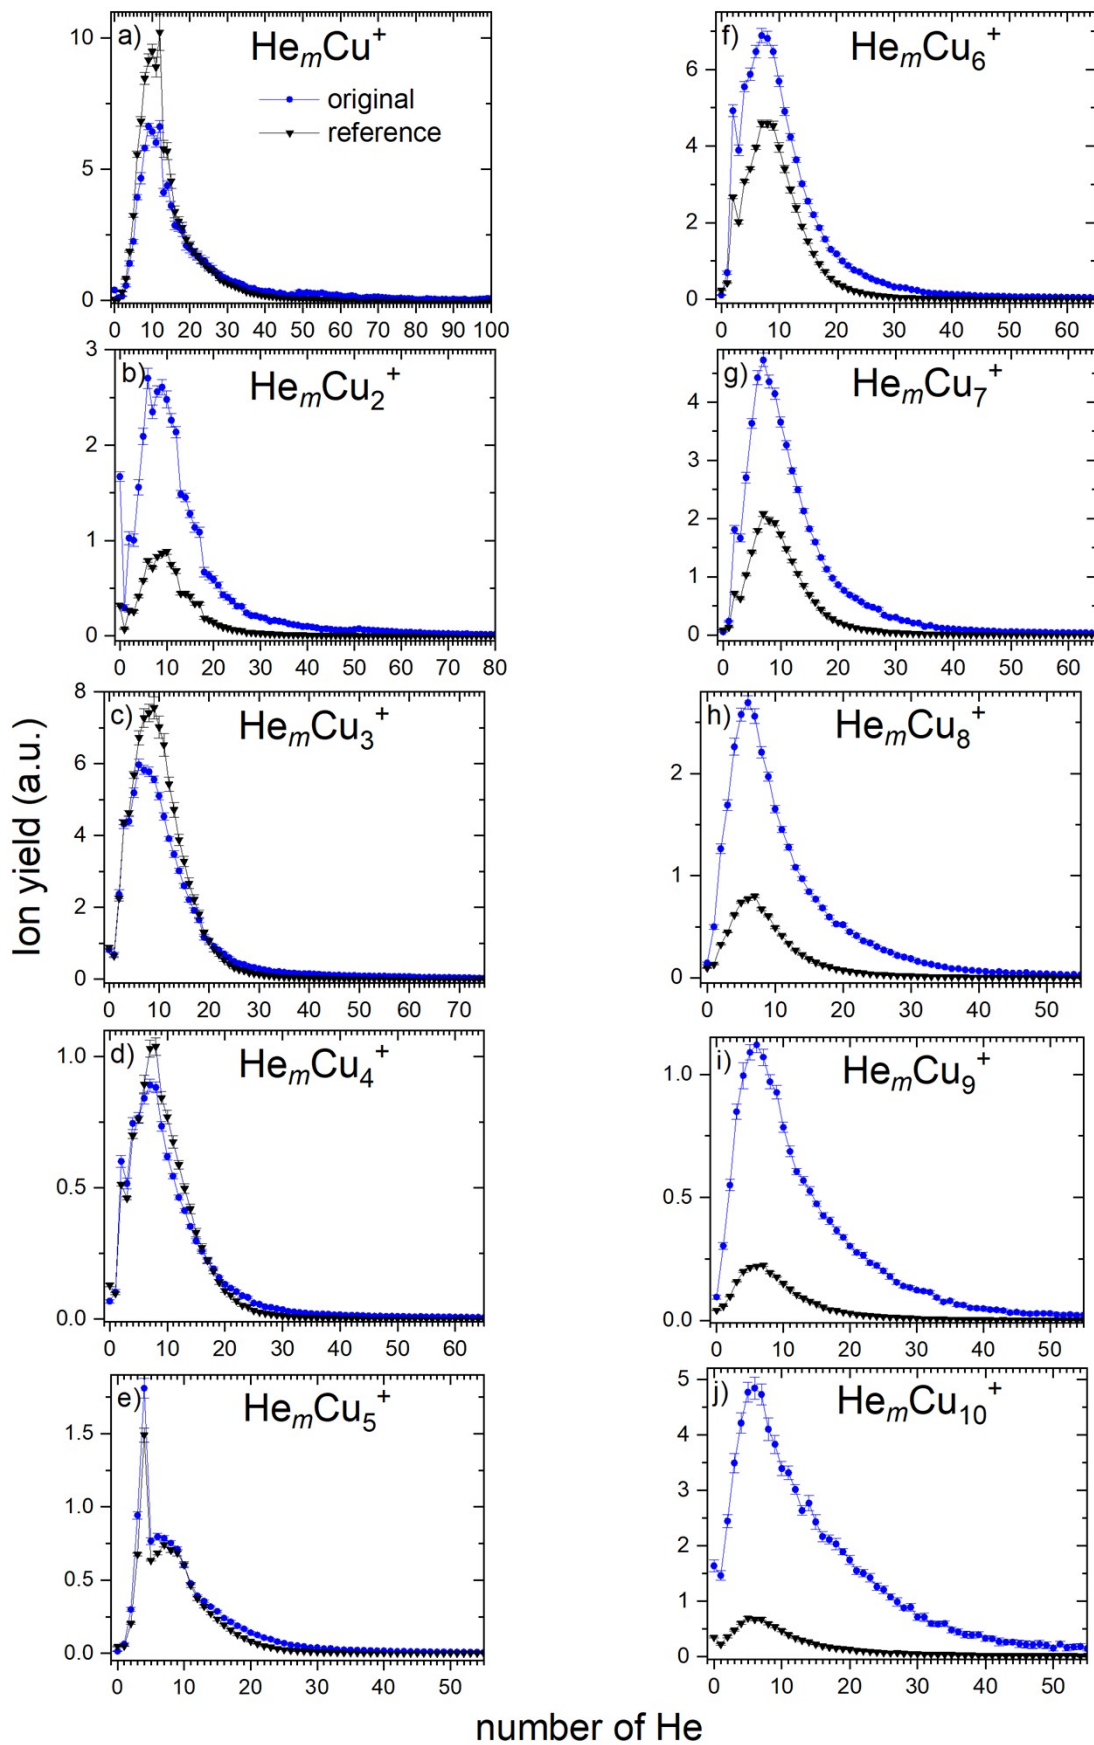

**Figure S2:** The cluster size distributions for  $\text{Cu}_n^+\text{-He}_m$  for original (blue circles) and reference (black triangles) measurements at  $9 \times 10^{-4}$  mbar. The distributions for each  $n$  are shown in separate plots. The symbols represent the ion yield of every  $m$  and are complemented with an error bar.

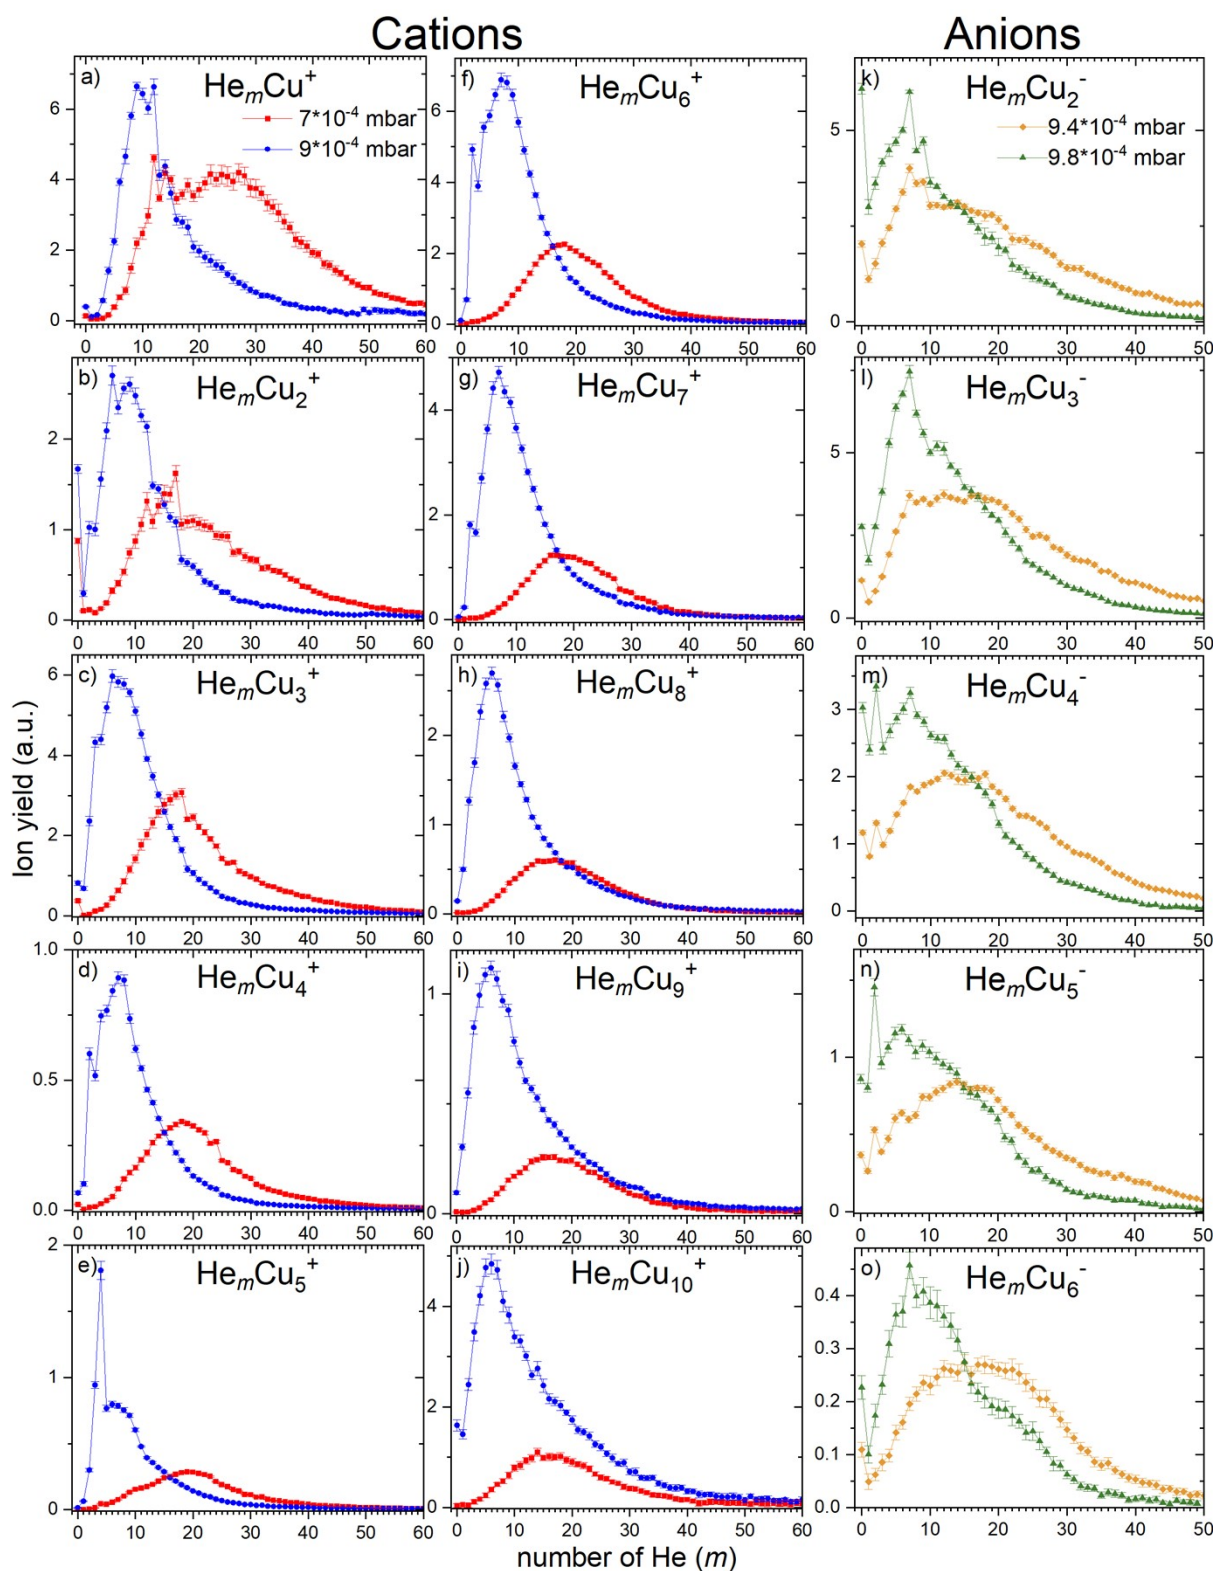

**Figure S3:** The cluster size distributions of  $\text{He}_m\text{Cu}_n^{+/-}$ . Plots a-j show the cations measured at  $7 \times 10^{-4}$  (red squares) and  $9 \times 10^{-4}$  mbar (blue circles). Plots k-o show the distributions of anions measured at  $9.4 \times 10^{-4}$  (orange diamonds) and  $9.8 \times 10^{-4}$  (green triangles). The  $\text{He}_m$  distributions for each  $\text{Cu}_n^{+/-}$  are shown in separate plots. The symbols represent the ion yield of every  $m$  and are complemented with an error bar.

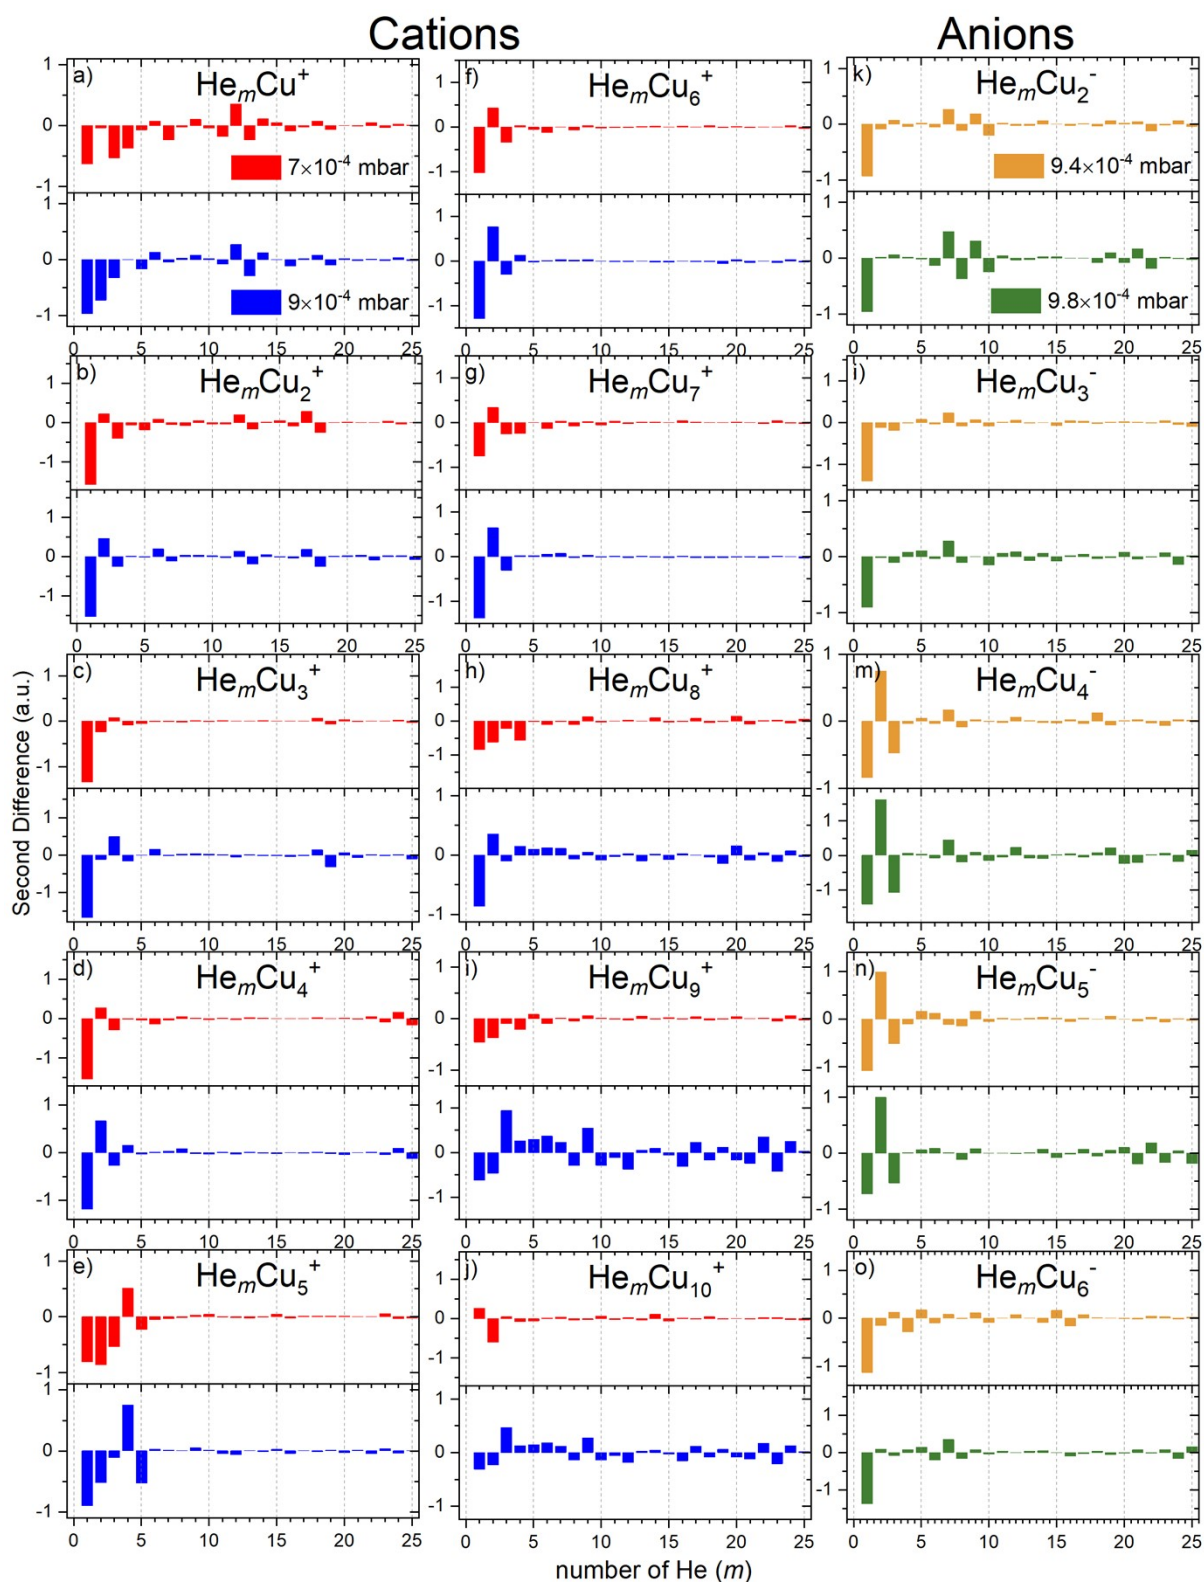

**Figure S4:** The second difference of the cluster size distributions of  $\text{He}_m\text{Cu}_n^{+/-}$ . Plots a-j show the cations measured at  $7 \times 10^{-4}$  (red bars) and  $9 \times 10^{-4}$  mbar (blue bars). Plots k-o show the distributions of anions measured at  $9.4 \times 10^{-4}$  (orange bars) and  $9.8 \times 10^{-4}$  (green bars). The second differences of each  $\text{He}_m$  distribution for each  $\text{Cu}_n^{+/-}$  are shown in separate plots.

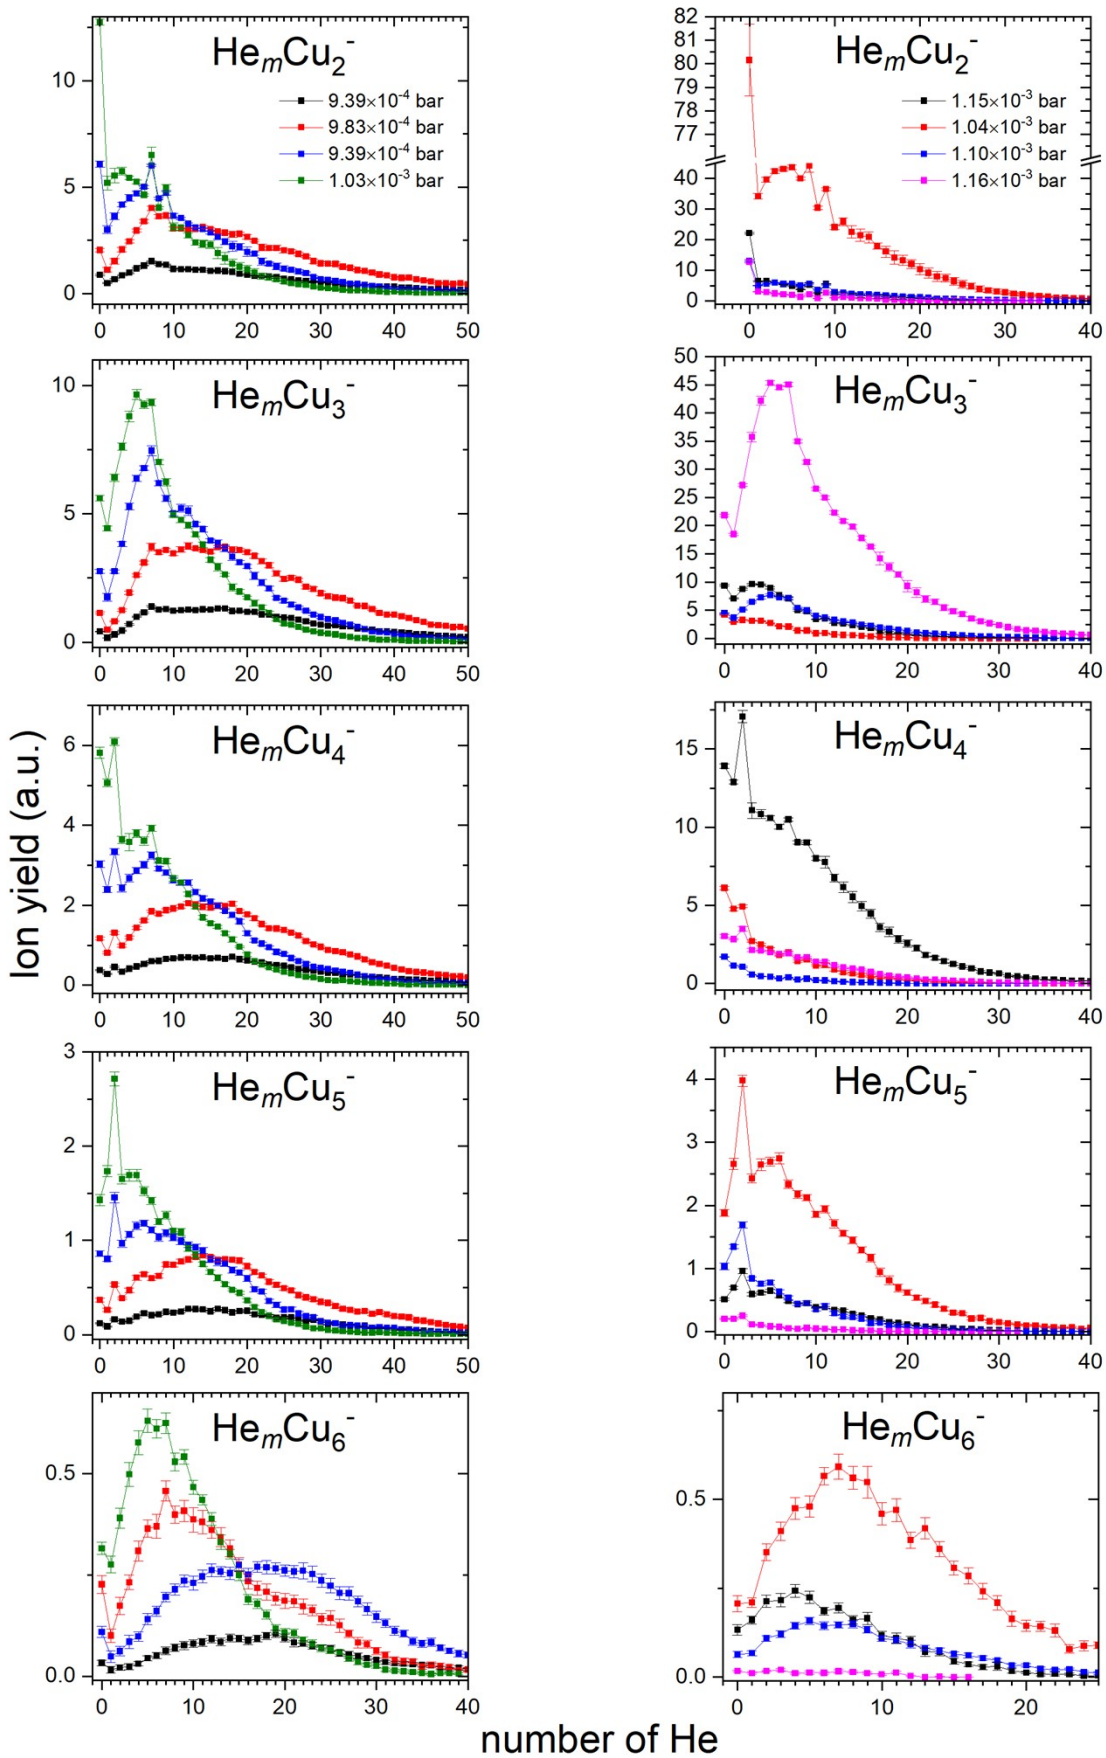

**Figure S5:** The cluster size distributions for  $\text{He}_m\text{Cu}_n^-$  measured at different pressures and conditions. The distributions for each  $n$  are shown in separate plots and the symbols represent the ion yield of every  $m$  accompanied by an error bar.



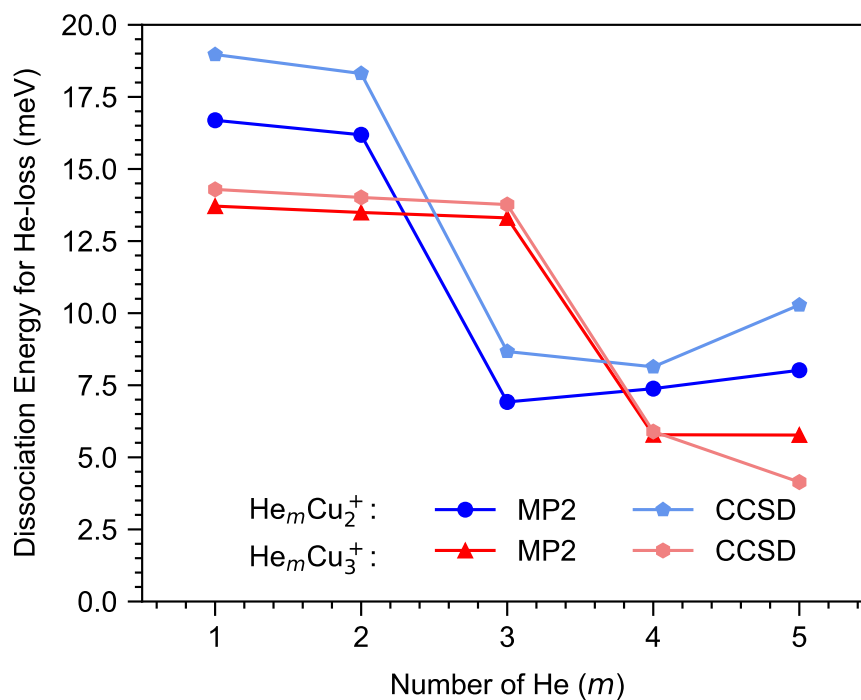

**Figure S6:** Comparison of binding energies of He determined for cationic Cu dimers and trimers from test calculations using the MP2 and CCSD methods, both with the def2-TZVPD basis set. The structure of each system was optimized on a counterpoise-corrected potential energy surface with the respective method. The results exclude any ZPE correction.

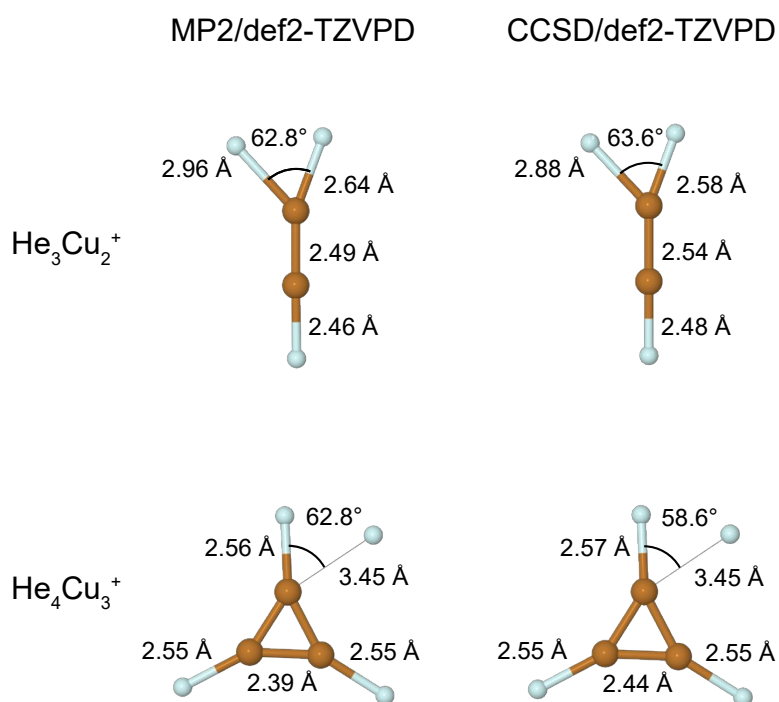

**Figure S7:** Select structures of He<sub>3</sub>Cu<sub>2</sub><sup>+</sup> (top row) and He<sub>4</sub>Cu<sub>3</sub><sup>+</sup> (bottom row) optimized at MP2/def2-TZVPD (left column) and CCSD/def2-TZVPD (right column) levels of theory. Bond lengths and angles vary slightly between the methods, but the geometries are otherwise very similar. This holds true for all structures we have tested with both methods.

# Coordinates

The atomic coordinates obtained from our optimized clusters of  $\text{He}_m\text{Cu}_n^{+/-}$  are given below in order of increasing  $n$  and  $m$  starting with the cations. They are all obtained at MP2/def2-TZVPD level of theory using a counterpoise correction during each step of the optimization process. These are cartesian coordinates in units of Å ( $10^{-10}$  m).

## Cations

### $\text{CuHe}^+$

|    |          |          |           |
|----|----------|----------|-----------|
| Cu | 0.000000 | 0.000000 | 0.144227  |
| He | 0.000000 | 0.000000 | -2.091291 |

### $\text{CuHe}_2^+$

|    |          |          |           |
|----|----------|----------|-----------|
| Cu | 0.000000 | 0.000000 | 0.000000  |
| He | 0.000000 | 0.000000 | 2.194381  |
| He | 0.000000 | 0.000000 | -2.194374 |

### $\text{CuHe}_3^+$

|    |           |           |           |
|----|-----------|-----------|-----------|
| Cu | 0.000000  | 0.001446  | -0.000000 |
| He | 1.955862  | 1.115412  | 0.000000  |
| He | -0.000000 | -2.251785 | 0.000000  |
| He | -1.955862 | 1.115413  | -0.000000 |

### $\text{CuHe}_4^+$

|    |           |           |           |
|----|-----------|-----------|-----------|
| Cu | 0.012245  | 0.005690  | 0.016935  |
| He | -0.580624 | -2.038281 | 0.892598  |
| He | 2.048523  | -0.588481 | -0.875620 |
| He | 0.614959  | 2.043648  | 0.898590  |
| He | -2.032618 | 0.605183  | -0.851916 |

### $\text{CuHe}_5^+$

|    |           |           |           |
|----|-----------|-----------|-----------|
| Cu | -0.000000 | 0.001009  | 0.046101  |
| He | -1.609796 | 1.598611  | 0.657099  |
| He | 1.679757  | 1.668650  | 0.177099  |
| He | 1.600062  | -1.611131 | 0.651810  |
| He | -1.670023 | -1.681170 | 0.161810  |
| He | -0.005000 | 0.010408  | -2.316284 |

### $\text{CuHe}_6^+$

|    |           |           |           |
|----|-----------|-----------|-----------|
| Cu | 0.000000  | -0.000000 | -0.000000 |
| He | 0.000000  | -0.000000 | 2.389393  |
| He | 2.389393  | 0.000000  | -0.000000 |
| He | 0.000000  | -0.000000 | -2.389393 |
| He | -2.389393 | -0.000000 | -0.000000 |
| He | -0.000000 | 2.389393  | -0.000000 |
| He | 0.000000  | -2.389393 | -0.000000 |

### $\text{CuHe}_7^+$

|    |           |           |           |
|----|-----------|-----------|-----------|
| Cu | -0.030593 | -0.004014 | 0.002573  |
| He | -0.759794 | -0.594356 | 2.228247  |
| He | -0.598544 | -1.612991 | -1.726527 |
| He | 1.687693  | 0.464495  | -1.652965 |
| He | 1.544336  | 1.265972  | 1.360818  |
| He | 1.526792  | -1.832450 | 0.503950  |
| He | -0.508104 | 2.286574  | -0.648827 |
| He | -2.448773 | 0.080955  | -0.102005 |

### $\text{Cu}_2^+$

|    |           |          |          |
|----|-----------|----------|----------|
| Cu | -0.280128 | 0.530504 | 0.000000 |
| Cu | 2.222250  | 0.530504 | 0.000000 |

Cu<sub>2</sub>He<sup>+</sup>  
Cu 0.000000 0.000000 -1.166886  
Cu 0.000000 0.000000 1.333340  
He 0.000000 0.000000 -3.641497

Cu<sub>2</sub>He<sub>2</sub><sup>+</sup>  
Cu -0.000000 0.000000 -0.987887  
Cu -0.000000 0.000000 1.510345  
He -0.000000 0.000000 -3.475195  
He -0.000000 0.000000 3.999848

Cu<sub>2</sub>He<sub>3</sub><sup>+</sup>  
Cu 0.166451 1.179690 0.000000  
Cu 0.035299 -1.309616 0.000000  
He 1.205267 3.606498 0.000000  
He -0.060417 -3.770307 0.000000  
He -1.724095 3.463475 0.000000

Cu<sub>2</sub>He<sub>4</sub><sup>+</sup>  
Cu -1.222537 0.372822 0.021639  
Cu 1.230533 -0.094354 0.037381  
He -3.568634 1.332713 -0.013532  
He 3.615054 1.907345 0.000603  
He -3.603226 -1.630043 -0.010436  
He 3.578581 -1.053135 0.062848

Cu<sub>2</sub>He<sub>5</sub><sup>+</sup>  
Cu 1.341951 -0.480441 0.056951  
Cu -1.134602 -0.164751 0.028360  
He -3.499826 -0.848586 -1.471340  
He 3.747435 -1.267520 0.101108  
He -3.520478 -0.737578 1.541801  
He -3.209409 1.789664 -0.057863  
He 3.589433 1.692666 -0.010213

Cu<sub>3</sub><sup>+</sup>  
Cu 2.105832 0.003579 0.000006  
Cu 0.032048 1.195305 -0.000227  
Cu 0.036193 -1.195314 0.000292

Cu<sub>3</sub>He<sup>+</sup>  
Cu 0.748744 1.221172 -0.000262  
Cu 0.784154 -1.168021 -0.000022  
Cu -1.306711 -0.004086 0.000320  
He -3.845619 -0.045380 0.000653

Cu<sub>3</sub>He<sub>2</sub><sup>+</sup>  
Cu -0.017982 1.312636 -0.001269  
Cu -1.185626 -0.771847 -0.000718  
Cu 1.207612 -0.738327 0.000528  
He 3.452469 -1.935228 -0.009447  
He -3.379339 -2.058786 -0.002207

Cu<sub>3</sub>He<sub>3</sub><sup>+</sup>  
Cu -0.205469 1.371007 0.023877  
Cu -1.078948 -0.853404 0.025207  
Cu 1.284089 -0.497725 0.029964  
He 3.676483 -1.384043 0.024903  
He -3.084120 -2.429698 0.021535  
He -0.602924 3.890062 0.031641

Cu<sub>3</sub>He<sub>4</sub><sup>+</sup>  
Cu 0.980397 -0.565401 0.000000  
Cu -0.488302 1.319591 -0.000000  
Cu -1.386265 -0.894954 0.000000  
He 3.347581 -1.521807 0.000000  
He -1.045521 3.823253 -0.000000

He 1.997562 3.712049 -0.000000  
He -3.399683 -2.465940 0.000000

Cu<sub>3</sub>He<sub>5</sub><sup>+</sup>

Cu -1.218645 -0.730726 0.000000  
Cu -0.411124 1.518116 -0.000000  
Cu 1.132639 -0.305830 0.000000  
He -3.166171 -2.385463 0.000000  
He 1.977582 4.009967 -0.000000  
He -1.068648 3.998040 -0.000000  
He 2.105480 -3.614687 0.000000  
He 3.611509 -0.969648 0.000000

Cu<sub>3</sub>He<sub>6</sub><sup>+</sup>

Cu 0.406749 1.318456 0.000000  
Cu 0.938322 -1.010960 -0.000000  
Cu -1.344799 -0.306611 0.000000  
He -1.663418 4.082674 0.000000  
He 1.358323 3.701393 0.000000  
He 2.525580 -3.027553 -0.000000  
He 4.366955 -0.601672 -0.000001  
He -3.884210 -0.674092 0.000000  
He -2.703501 -3.481637 0.000000

Cu<sub>3</sub>He<sub>7</sub><sup>+</sup>

Cu -1.108791 -0.873548 -0.021924  
Cu -0.316013 1.376513 0.104940  
Cu 1.239553 -0.434769 0.014841  
He -0.838741 -4.310826 -0.207486  
He -3.189212 -2.376952 -0.115174  
He -0.579063 3.928318 0.242417  
He -3.430982 2.863890 0.169300  
He 3.531360 -1.636445 -0.042036  
He 3.939763 1.022155 -1.471057  
He 3.906135 0.805661 1.738887

Cu<sub>4</sub><sup>+</sup>

Cu -0.005750 0.023427 0.052021  
Cu 2.194756 -0.841958 0.751540  
Cu 2.137413 0.814584 -0.878907  
Cu 4.338256 -0.053182 -0.180586

Cu<sub>4</sub>He<sup>+</sup>

Cu -2.176203 -0.056487 -0.000455  
Cu 0.001366 1.099799 0.001886  
Cu -0.002217 -1.225797 -0.002903  
Cu 2.175343 -0.063275 -0.000452  
He -0.012599 -4.046925 -0.005216

Cu<sub>4</sub>He<sub>2</sub><sup>+</sup>

Cu 2.174938 0.007344 0.000240  
Cu -0.003625 1.162838 -0.000772  
Cu 0.003629 -1.162691 0.001387  
Cu -2.174936 -0.006365 0.000238  
He 0.018697 -3.991693 -0.002189  
He -0.018845 3.992047 0.000084

Cu<sub>4</sub>He<sub>3</sub><sup>+</sup>

Cu -0.000000 -0.000000 2.202010  
Cu -0.000000 1.162317 0.027242  
Cu -0.000000 -1.162317 0.027242  
Cu -0.000000 -0.000000 -2.148521  
He 0.000000 -3.990401 0.026706  
He 0.000000 3.990401 0.026706  
He -0.000000 -0.000000 5.535041

Cu<sub>4</sub>He<sub>4</sub><sup>+</sup>

|    |           |           |           |
|----|-----------|-----------|-----------|
| Cu | -0.000000 | 0.000000  | 2.175868  |
| Cu | 0.000000  | 1.161686  | -0.000000 |
| Cu | -0.000000 | -1.161686 | 0.000000  |
| Cu | -0.000000 | 0.000000  | -2.175868 |
| He | 0.000000  | -3.990561 | 0.000000  |
| He | 0.000000  | 3.990561  | 0.000000  |
| He | -0.000000 | 0.000000  | 5.502269  |
| He | 0.000000  | 0.000000  | -5.502269 |

#### Cu<sub>4</sub>He<sub>5</sub><sup>+</sup>

|    |           |           |           |
|----|-----------|-----------|-----------|
| Cu | -2.174931 | -0.048757 | -0.133955 |
| Cu | 0.000336  | 1.103893  | -0.279217 |
| Cu | 0.000110  | -1.201910 | 0.014763  |
| Cu | 2.175630  | -0.050387 | -0.131249 |
| He | -0.000647 | -4.019241 | 0.417856  |
| He | -0.001467 | 3.866834  | -1.014186 |
| He | -5.488728 | -0.043025 | -0.133957 |
| He | 5.489349  | -0.046849 | -0.127431 |
| He | 0.003745  | 3.626879  | 2.055745  |

#### Cu<sub>5</sub><sup>+</sup>

|    |           |           |           |
|----|-----------|-----------|-----------|
| Cu | 0.000125  | -0.001162 | -0.000322 |
| Cu | -2.171933 | -0.849734 | 0.702150  |
| Cu | 2.191010  | -0.790808 | -0.713076 |
| Cu | -2.098631 | 0.803576  | -0.937554 |
| Cu | 2.079429  | 0.838127  | 0.948802  |

#### Cu<sub>5</sub>He<sup>+</sup>

|    |           |           |           |
|----|-----------|-----------|-----------|
| Cu | -0.023038 | -0.068538 | -0.019218 |
| Cu | 2.174710  | 0.623701  | 0.769260  |
| Cu | -2.231557 | 0.865601  | -0.442913 |
| Cu | 2.036817  | -0.617248 | -1.197499 |
| Cu | -2.071603 | -1.106640 | 0.787203  |
| He | -3.974151 | 3.012908  | -1.696108 |

#### Cu<sub>5</sub>He<sub>2</sub><sup>+</sup>

|    |           |           |           |
|----|-----------|-----------|-----------|
| Cu | 0.071323  | -0.000028 | 0.005341  |
| Cu | -2.077073 | -1.142967 | -0.030850 |
| Cu | 2.206040  | 0.018477  | -1.166508 |
| Cu | -2.054002 | 1.185577  | 0.043466  |
| Cu | 2.214217  | -0.058889 | 1.161618  |
| He | -3.785555 | -3.690988 | -0.031925 |
| He | -3.330630 | 3.939928  | -0.052204 |

#### Cu<sub>5</sub>He<sub>3</sub><sup>+</sup>

|    |           |           |           |
|----|-----------|-----------|-----------|
| Cu | 0.024284  | 0.015720  | -0.075300 |
| Cu | 2.181541  | -1.070524 | 0.227501  |
| Cu | -2.229145 | 0.012057  | 0.848586  |
| Cu | 2.112218  | 1.254268  | 0.099050  |
| Cu | -1.971054 | -0.122952 | -1.462410 |
| He | -3.672017 | 0.144194  | 3.514645  |
| He | 3.422863  | -3.834721 | 0.426598  |
| He | 3.142916  | 4.116657  | 0.051052  |

#### Cu<sub>5</sub>He<sub>4</sub><sup>+</sup>

|    |           |           |           |
|----|-----------|-----------|-----------|
| Cu | 0.079841  | 0.011962  | 0.045668  |
| Cu | 2.230517  | 0.183226  | -1.081084 |
| Cu | -2.133104 | -0.954006 | -0.261662 |
| Cu | 2.193532  | -0.455996 | 1.158386  |
| Cu | -1.970831 | 1.282887  | 0.367071  |
| He | -3.055645 | 4.036736  | 1.044066  |
| He | -3.619726 | -3.504184 | -0.988147 |
| He | 3.610831  | 0.928073  | -3.687752 |
| He | 3.326325  | -1.345709 | 3.840739  |

#### Cu<sub>5</sub>He<sub>5</sub><sup>+</sup>

|    |           |           |           |
|----|-----------|-----------|-----------|
| Cu | -0.132730 | -0.092640 | -0.028396 |
|----|-----------|-----------|-----------|

Cu 1.924732 -1.047420 -0.910931  
Cu -2.276334 -0.777859 0.899053  
Cu 2.075658 0.635512 0.691824  
Cu -2.255031 0.818202 -0.796984  
He 1.526301 -3.371006 -3.159136  
He -3.362571 2.815084 -2.802555  
He 3.383439 2.639551 2.567678  
He 4.538627 -2.462825 -2.446791  
He -3.422463 -2.660228 2.993945

$\text{Cu}_6^+$

Cu -0.011571 0.300584 1.200880  
Cu -2.152806 1.280733 0.432098  
Cu 2.120058 1.305794 0.437019  
Cu -1.288790 -0.718238 -0.638466  
Cu 1.279651 -0.704290 -0.637994  
Cu -0.014687 1.378997 -0.819905

$\text{Cu}_6\text{He}^+$

Cu -0.000151 -0.353049 -1.216220  
Cu -2.133923 -0.916657 -0.080705  
Cu 2.133769 -0.916728 -0.081186  
Cu -1.284750 1.358145 -0.010534  
Cu 1.284727 1.358141 -0.010985  
Cu 0.000050 -0.444060 1.073397  
He -0.000105 -0.309281 -3.653632

$\text{Cu}_6\text{He}_2^+$

Cu -0.000231 -0.415479 -1.144418  
Cu -2.132224 -0.940327 0.000628  
Cu 2.131600 -0.940637 -0.000861  
Cu -1.285842 1.336068 0.006775  
Cu 1.285330 1.335915 0.006164  
Cu -0.000259 -0.422514 1.146645  
He -0.000886 -0.406890 -3.612992  
He 0.000292 -0.407400 3.618622

$\text{Cu}_6\text{He}_3^+$

Cu 0.023061 -0.343673 -1.145494  
Cu -2.111293 -0.855339 0.000422  
Cu 2.152567 -0.875006 0.000089  
Cu -1.254888 1.417101 0.000469  
Cu 1.315976 1.405157 0.000344  
Cu 0.023020 -0.344066 1.145538  
He 0.022856 -0.328504 -3.617064  
He 0.023044 -0.329397 3.616744  
He 5.212488 -2.479746 0.001779

$\text{Cu}_6\text{He}_4^+$

Cu -0.002766 -0.346458 -1.145378  
Cu -2.135731 -0.857569 0.000151  
Cu 2.126810 -0.875138 -0.000108  
Cu -1.280510 1.414929 -0.000583  
Cu 1.289387 1.404376 -0.001021  
Cu -0.001821 -0.344745 1.146629  
He -0.003163 -0.329846 -3.617412  
He -0.001319 -0.324260 3.618479  
He 5.188686 -2.480997 0.001116  
He -5.117039 -2.598120 0.002321

$\text{Cu}_6\text{He}_5^+$

Cu 0.005249 -0.418852 -1.151174  
Cu -2.130885 -0.950335 -0.017851  
Cu 2.132637 -0.968668 -0.011290  
Cu -1.274835 1.322449 0.020808  
Cu 1.296428 1.311318 0.025123  
Cu 0.000895 -0.456639 1.139319

He -3.975359 3.883987 -0.032707  
He 4.860831 -3.090281 -0.016999  
He -4.678864 -3.304259 -0.024112  
He -0.001563 -0.480141 3.612718  
He 0.011464 -0.360142 -3.623947

#### Cu<sub>6</sub>He<sub>6</sub><sup>+</sup>

Cu 0.000572 -0.422681 -1.151771  
Cu -2.135525 -0.954593 -0.016966  
Cu 2.127681 -0.971418 -0.012225  
Cu -1.281015 1.318233 0.020261  
Cu 1.289567 1.307744 0.024308  
Cu -0.004559 -0.460373 1.139574  
He -3.983544 3.876568 -0.033843  
He 3.973740 3.881852 -0.065451  
He 4.857690 -3.092757 -0.017929  
He -4.683029 -3.314208 -0.021934  
He -0.008529 -0.479960 3.613830  
He 0.004611 -0.360221 -3.625688

## Anions

#### CuHe<sup>-</sup>

Cu 0.000000 0.000000 0.401051  
He 0.000000 0.000000 -5.920826

#### Cu<sub>2</sub><sup>-</sup>

Cu 0.167581 1.196307 -0.000000  
Cu 0.167581 -1.196096 0.000000

#### Cu<sub>2</sub>He<sup>-</sup>

Cu 0.679631 1.329588 -0.000000  
Cu -1.169359 -0.188577 -0.000000  
He -3.437612 4.454004 -0.000000

#### Cu<sub>3</sub><sup>-</sup>

Cu 4.154495 -1.180706 0.000021  
Cu 0.030161 1.180688 -0.000007  
Cu 2.092329 -0.000009 0.000007

#### Cu<sub>3</sub>He<sup>-</sup>

Cu 1.351351 -0.041828 -1.143181  
Cu -1.802552 0.055794 2.410433  
Cu -0.227272 0.007035 0.632141  
He 3.170033 -0.098121 3.648863

#### Cu<sub>4</sub><sup>-</sup>

Cu 2.092331 -0.000022 -0.000007  
Cu -0.000000 -1.197926 0.000007  
Cu 0.000010 1.197963 0.000007  
Cu -2.092341 -0.000016 -0.000007

#### Cu<sub>4</sub>He<sup>-</sup>

Cu -0.374801 0.005477 1.791581  
Cu 0.613160 -1.207038 -0.046059  
Cu 0.665991 1.189704 -0.035301  
Cu 1.657488 -0.022881 -1.870968  
He 4.220280 -0.094532 1.937419

#### Cu<sub>5</sub><sup>-</sup>

Cu -0.000214 -0.793068 0.000681  
Cu -1.192780 1.303138 -0.001472  
Cu 2.350866 -0.904436 0.001163  
Cu -2.351286 -0.904433 0.000952  
Cu 1.192374 1.303135 -0.001323

Cu<sub>5</sub>He<sup>-</sup>

|    |           |           |           |
|----|-----------|-----------|-----------|
| Cu | -0.000216 | -0.793068 | 0.000684  |
| Cu | -1.192735 | 1.303067  | -0.001392 |
| Cu | 2.350775  | -0.904359 | 0.001200  |
| Cu | -2.351198 | -0.904364 | 0.000912  |
| Cu | 1.192335  | 1.303059  | -0.001403 |
| He | 0.006302  | -0.020243 | 3.950447  |

Cu<sub>5</sub>He<sub>2</sub><sup>-</sup>

|    |           |           |           |
|----|-----------|-----------|-----------|
| Cu | 0.000108  | -0.789060 | 0.002868  |
| Cu | -1.192430 | 1.307057  | -0.002939 |
| Cu | 2.351100  | -0.900329 | 0.003662  |
| Cu | -2.350873 | -0.900377 | 0.003209  |
| Cu | 1.192640  | 1.307071  | -0.002867 |
| He | 0.009200  | -0.045562 | -3.949596 |
| He | 0.006480  | -0.009285 | 3.951265  |
